# Supplementary material for: Effects of nitrogen topdressing and paclobutrazol at different stages on spike differentiation and yield of winter wheat
Source: PeerJ. 2021 Nov 29;9:e12473. doi: 10.7717/peerj.12473 (PMC8638589; doi:10.7717/peerj.12473)
Supplement: Supplemental Information 1 — All indexes reflecting wheat spikelet growth and yield with physiological function changing under interactive treatments of nitrogen and paclobutrazol in two years. [file peerj-09-12473-s001.xlsx]

## Sheet: Plant height
2011-2012	TS	TPS	TJ	TPJ		2012-2013	TS	TPS	TJ	TPJ
Pseudostem erection stage	18.5	15.7	20.5	17.8			19.4	18	19.6	20.6
	17.5	19.2	17.5	18.2			19.8	19.2	19.5	19.8
	18.2	16.8	18.8	18.5			20.5	19.5	20	20.3
	18	17.2	20.7	18.2			18.3	18.3	18.3	18.6
	17	18.5	17.5	18.7			17.5	18.5	17.7	17.8
	17.84	17.48	19	18.28			19.1	18.7	19.02	19.42
Jointing stage	30.1	28.2	27.9	27.7			28.36	24.5	25	25.5
	30.2	28.4	27.8	27.7			26.6	23.2	27.5	27
	29.1	28	27.2	27.5			28	23.3	27	27
	29.3	27.8	27.6	27.8			25.4	23.7	23.5	23.2
	29.8	28.2	27.5	27.5			27.2	23.2	27	27.3
	29.7	28.12	27.6	27.64			27.112	23.58	26	26
Booting stage	60.3	59.3	56.3	58.3			56	50	50.4	46
	60.7	59.2	58.3	57.7			54.8	51.6	53	47.6
	60	58	57.4	54.4			54.2	52.8	53.3	48.8
	60.7	59.7	57	57.2			53.5	51.1	48.7	51.1
	60	57	56.5	54			53.7	51.2	48.2	47.2
	60.34	58.64	57.1	56.32			54.44	51.34	50.72	48.14
Maturity stage	70.4	67.5	65.4	64.4			68.2	67.5	66.4	63
	69.9	67.3	64.3	65.3			68.2	67.8	66.2	63.3
	68.3	67	67.9	64.1			68.8	67.4	67.6	60.8
	70.6	68.7	67.6	63.8			69.5	67.6	65.7	61.1
	67	67.5	66.6	63			68.6	65	64.2	60.2
	69.24	67.6	66.36	64.12			68.66	67.06	66.02	61.68
		Table 2. Plant height of wheat under different treatments.
		Year	Treatment	Plant height (cm)
				Pseudostem erection stage	Jointing stage	Booting stage	Maturity stage
		2011-2012	TS	17.8a	29.7a	60.3a	69.2a
			TPS	17.5a	28.1b	58.6b	68.7b
			TJ	19.0a	27.6c	57.1b	66.4b
			TPJ	18.3a	27.6c	56.3c	64.1c
		2012-2013	TS	19.1a	27.1a	54.4a	68.7a
			TPS	18.7a	23.6b	51.3b	67.1b
			TJ	19.0a	26.0a	50.7b	66.0b
			TPJ	19.4a	26.0a	48.1c	61.7c

## Sheet: Yield and yield components
2011-2012
	Grains number per spike	thousand grains weight(g)	spikle (10000/hm2)	Yield （Kg/hm2）
	32.86	39.44	850.58	9000.4
	32.81	39.56	798.96	8865.21
	35.15	38.69	740.48	8970.4
	33.72	39.75	810.65	8119.76
	35.2667	39.98	781.27	9063.77
	34.2	38.53	664.9	9093.96
	36.03	41.13	814.97	9478.79
	36.29	39.98	890.696	8904.87						Table 3. Wheat yield and yield components under different treatments.
	36.31	40.58	690.933	9686.35
	35.71	42.28	798.67	9644.57			Year	Treatments	Spikes	Grains Per spike	Thousand grain weight (g)	Yield
	37.02	41.32	885.78	9496.61					(×104·ha–1)			(t·ha–1)
	37.86	41.22	738.83	9873.84			2011-2012	TS	796.7a	33.6b	39.2c	8.8b
								TPS	752.3a	34.4b	39.4bc	8.9b
								TJ	798.9a	36.2a	40.6ab	9.4ab
2012-2013								TPJ	807.8a	36.9a	41.6a	9.7a
	Grains number per spike	thousand grains weight(g)	spikle (10000/hm2)	Yield （Kg/hm2）
TS	33.5106	30.264	710.655	7517.09			2012-2013	TS	829.4a	33.3bc	28.0b	7.5b
	32.2667	26.939	920.46	7470.4				TPS	834.9a	32.9c	27.8b	7.6b
	34.2	26.904	857.095	7563.78				TJ	806.0a	35.8ab	31.7a	7.8ab
TPS	30.8714	29.626	797.065	7590.46				TPJ	823.4a	36.7a	30.5ab	8.1a
	32.5417	27.709	843.755	7710.52
	35.4333	26.178	863.765	7470.4
TJ	35.6304	33.134	767.38	7670.5
	35.0426	31.207	813.74	8097.38
	36.619	30.613	837.085	7763.88
TPJ	37.1176	31.882	793.03	7883.94
	36.7742	29.033	880.11	8124.06
	36.3333	30.613	797.065	8364.18

## Sheet: Spike differentiation
2011-2012
spikelet number					floret number					Floret number differentiated from stamen and gynoecium					Floret number differentiated from connectivum
TS	TPS	TJ	TPJ		TS	TPS	TJ	TPJ		TS	TPS	TJ	TPJ		TS	TPS	TJ	TPJ
22	19	21	21		140	142	136	151		118	101	113	123		52	54	58	61
21	19	21	21		142	146	151	153		118	102	115	124		53	56	60	62
20	19	21	21		147	139	144	148		117	103	116	122		50	56	60	61
21	19	22	20		142	130	150	152		120	103	117	124		52	60	58	65
20	20	19	19		133	134	146	147		119	102	116	125		54	58	59	64
20.8	19.2	20.8	20.4		140.8	138.2	145.4	150.2		118.4	102.2	115.4	123.6		52.2	56.8	59	62.6
2012-2013					floret number					Floret number differentiated from stamen and gynoecium					Floret number differentiated from connectivum
spikelet number
TS	TPS	TJ	TPJ
20	19	19	20		149	142	149	147		101	96	113	114		68	66	86	84
19	19	19	19		144	146	155	150		97	94	117	110		66	64	92	82
19	18	18	19		152	142	150	152		101	100	112	109		70	69	89	89
19	18	19	19		152	141	151	150		102	94	112	119		68	64	84	90
20	18	19	18		147	138	147	149		96	98	109	117		63	68	87	84
19.4	18.4	18.8	19		148.8	141.8	150.4	149.6		99.4	96.4	112.6	113.8		67	66.2	87.6	85.8
			Table 4. Spike differentiation of wheat under different treatments.
			Year	Treatments	Differentiation Spikelet number	Differentiation Floret number	Floret number differentiated from stamen and gynoecium	Floret number differentiated from connectivum
			2011-2012	TS	20.8a	140.8b	118.4b	52.2c
				TPS	19.2b	138.2b	102.2c	56.8b
				TJ	20.8a	145.4ab	115.4b	59.0b
				TPJ	20.4ab	150.2a	123.6a	62.6a
			2012-2013	TS	19.4a	148.8a	99.4b	67.0b
				TPS	18.4b	141.8b	96.4b	66.2b
				TJ	18.8ab	150.4a	112.6 a	87.6a
				TPJ	19.0ab	149.6a	113.8a	85.8a

## Sheet: phytohormone content
		average				stdev.
2011-2012	CTK	TS	TPS	TJ	TPJ	TS	TPS	TJ	TPJ
	1	32	27	31.8	27.2	2.4	1.5	1.3	0.9
	2	41.6	42	41	40.5	3.6	2.4	2	1.8
	3	80.2	71.3	63.3	63	5.2	3.3	3.6	2.7
	4	48	47	48.5	46.7	4.3	4	3	2
	5	33	34	33	32	1.8	1.2	1.1	1.4
	IAA	TS	TPS	TJ	TPJ
	double-ridge stage	595.8	519.6	774	642	42	47	39.8	37.2
	floret primordium formation stage	966.8	910	922	926	84.6	52	61	70.5
	pistil and stamen primordium formation stage	1524.3	1418	1325	1210	100.2	91.3	83.3	63
	anther connective stage	1398	1376	1282.2	1184.3	101	97	78.5	36.7
	Tetrad stage	888.7	872.6	690	758	63	54	63	52
	GA
		TS	TPS	TJ	TPJ
	double-ridge stage	12.6	12.3	12.65	12.5	1.4	1.5	1.3	0.8
	floret primordium formation	32.8	31	23.92	23.83	1.6	2.4	2	1.3
	pistil and stamen primordium	28.2	17.77	19.5	18.87	3.2	3.3	2.6	1.8
	anther connective stage	18.4	13.2	17.16	14.62	0.8	2.3	2.8	1
	Tetrad stage	6.28	7.5	6.53	6.9	1.5	1.2	1	0.7
		TS	TPS	TJ	TPJ
	double-ridge stage	96.2	88.3	90.6	90.4	13.4	11.5	11.3	20.8
	floret primordium formation	126	118	178.2	153.9	23.6	22.4	20	11.3
	pistil and stamen primordium	220.6	209.89	215	213.4	13.2	15.3	26.6	21.8
	anther connective stage	251.4	245.2	230	221.5	14.8	27.3	13.8	31
	Tetrad stage	403.96	388.47	341.7	301.3	21.5	25.2	28	15.7

## Sheet: IPA  and ZR content 
	IPA	Tetrad stage	TS	TPS	TJ	TPJ	stdev.
		0 day after flowering	9.46582	9.22793	9.3	10.0897	0.373819	0.713163	0.242679	0.677
		3 day after flowering	12.3146	11.2526	12.3124	13.8346	0.587609	0.68966	0.617289	1.00548
		6 day after flowering	11.81	10.8752	12.13	12.8147	0.614847	0.774876	0.425599	0.385153
		9 day after flowering	12.0634	11.7087	12.9849	12.9619	0.20445	0.319445	0.10353	0.212553
		12 day after flowering	7.85237	7.35604	9.82288	8.21814	0.505178	0.491173	0.974398	0.03248
		15 day after flowering	7.56213	7.5114	8.7044	9.4481	0.857044	0.48858	0.40019	0.243812
			5.07673	6.74928	6.61999	8.23429	0.599026	0.771486	0.244443	0.328577
			10.1467	11.5825	9.3	11.71	0.2663	0.156727	0.6595	0.874263
	ZR	Tetrad stage	12.2078	11.8835	14.4385	13.5123	0.340944	0.769012	1.07859	0.604094
		0 day after flowering	13.1991	11.6907	13.2736	14.61	0.343431	0.046059	0.728721	0.689656
		3 day after flowering	15.1871	14.6048	15.0663	15.1494	0.202146	1.11176	0.0503382	0.235838
		6 day after flowering	12.1366	11.566	14.2226	12.4077	0.688665	1.07548	1.31696	0.529684
		9 day after flowering	11.0219	10.2306	12.8538	13.2739	0.491531	0.91458	0.11764	1.07804
		12 day after flowering	8.77383	9.29169	9.80662	9.88971	0.614624	0.618368	0.176589	0.320373
		15 day after flowering
	ipa+Zr	Tetrad stage	19.6125	20.8104	18.5981	21.8027	0.608209	0.671034	0.862117	0.20081
		0 day after flowering	24.5224	23.1361	26.751	27.3469	0.898272	0.46094	1.48668	1.44558
		3 day after flowering	25.0138	22.5659	25.0466	27.4246	0.952506	0.732873	0.546597	0.886314
		6 day after flowering	27.2505	26.3135	28.0512	28.1113	0.406596	0.991419	0.153869	0.448391
		9 day after flowering	19.989	18.922	24.0455	20.6258	1.12071	0.665139	1.7432	0.519406
		12 day after flowering	18.5841	17.742	21.771	22.722	1.26797	0.76589	0.715988	1.30209
		15 day after flowering	13.8506	16.041	16.4266	18.124	1.16455	0.695369	0.374808	0.358588

## Sheet: Gene Expression
														ID*	Primer(5'to3')	Base number	Tubes	Quantum(O.D)	Purification
	Treatments	Stages	2-ΔΔct			average			Average					TaCKX2.2-F	GGGAGAAGAAGCACTTTGGTC	21	2	2	ULTRAPAGE
	TS	1	0.954766	1.25738	0.794766	1.0023		stages	TS	TPS	TJ	TPJ		TaCKX2.2-R	CCTGCAGTAAACTCAAACCATATC	24	2	2	ULTRAPAGE
		2	1.83332	2.33027	2.78993	2.31784		Stamens and pistils stage	1.0023	0.997699	1.00575	1.00084
		3	4.47111	6.94246	10.8566	7.42338		Early stage of connectivum	2.31784	2.13718	4.46449	4.47449
		4	30.124	34.3996	22.6668	29.0635		Late stage of connectivum	7.42338	13.8349	18.9213	20.4142
		5	166.793	152.237	145.1	154.71		Tetrad stage	29.0635	39.3803	36.1305	85.0183
		6	307.43	162.982	234.51	234.974		0 day after flowering	154.71	138.829	904.852	1163.69
		7	620.124	541.895	392.467	518.162		3 day after flowering	234.974	233.568	802.386	1048.06
		8	63.8634	27.1332	48.7441	46.5802		6 day after flowering	518.162	457.761	1489.8	1708.6
		9	205.579	281.444	254.248	247.09		9 day after flowering	46.5802	56.8805	214.262	183.767
								12 day after flowering	247.09	85.7642	796.94	905.034
	TPS	1	0.512926	1.11012	1.37005	0.997699			stdev.
		2	1.43459	1.1834	3.79355	2.13718			TS	TPS	TJ	TPJ
		3	18.8891	10.2631	12.3526	13.8349		Stamens and pistils stage	0.23494	0.439481	0.56406	0.577918
		4	30.9275	38.1587	49.0548	39.3803		Early stage of connectivum	0.478429	1.43995	1.66765	1.68423
		5	185.219	100.741	130.528	138.829		Late stage of connectivum	3.21978	4.5	9.19979	12.9621
		6	293.354	220.472	186.877	233.568		Tetrad stage	5.93789	9.12519	14.8559	33.3171
		7	686.852	299.399	387.032	457.761		0 day after flowering	11.0559	42.8468	55.6534	259.488
		8	50.9761	42.7221	76.9433	56.8805		3 day after flowering	72.2251	54.433	129.807	312.854
		9	87.9927	76.9906	92.3093	85.7642		6 day after flowering	115.669	103.18	379.32	486.13
								9 day after flowering	18.4605	17.8583	36.7373	92.1021
								12 day after flowering	38.436	7.89874	228.579	154.134
	TJ	1	1.56802	0.43992	1.00931	1.00575
		2	6.30637	3.05706	4.03005	4.46449
		3	19.0289	9.66814	28.0668	18.9213
		4	37.8277	50.0649	20.4989	36.1305
		5	902.722	961.539	850.293	904.852
		6	685.98	942.364	778.813	802.386
		7	2085.06	927.87	1456.45	1489.8
		8	240.771	229.687	172.327	214.262
		9	874.374	976.744	539.701	796.94
	TPJ	1	1.12802	0.36992	1.50457	1.00084
		2	6.33637	3.05706	4.03005	4.47449
		3	33.5359	20.0889	7.61778	20.4142
		4	88.5136	50.0913	116.45	85.0183
		5	955.342	1454.35	1081.37	1163.69
		6	986.151	1387.24	770.787	1048.06
		7	2439.27	1078.01	1608.5	1708.6
		8	95.4941	279.272	176.535	183.767
		9	802.762	830.024	1082.32	905.034

## Sheet: correlation 
		IPA+ZR	Floret number in stamens and pistils differentiation stage	IPA+ZR	Florets number differentiated from connectivum
	0 day after flowering	25.2203	101	25.2203	68			R2	R	R2	R
		23.509	97	23.509	66		0 day after flowering	0.7303	0.854576	0.6799	0.82456
		24.838	101	24.838	68		3 day after flowering	0.3965	0.629682	0.4688	0.68469
		23.0888	96	23.0888	66		6day after flowering	0.5258	0.725121	0.4995	0.706753
		23.6188	94	23.6188	64		9 day after flowering	0.4665	0.683008	0.3601	0.600083
		22.7005	98	22.7005	68		12 day after flowering	0.7655	0.874929	0.8336	0.913017
		28.2864	113	28.2864	86		15 day after flowering	0.3018	0.549363	0.4836	0.695414
		28.072	112	28.072	89
		25.6823	112	25.6823	87
		25.6724	110	25.6724	84
		26.1337	119	26.1337	89
		28.4468	117	28.4468	84
	3 day after flowering	26.0081	101	26.0081	68		content of (IPA+ZR)	florets differentiated from connectivum	florets differentiated from stamen and gynoecium
		24.9238	97	24.9238	66		0 day after flowering	0.825**	0.855**
		24.1095	101	24.1095	68		3 days after flowering	0.685*	0.63*
		22.5447	96	22.5447	66		6 days after flowering	0.766**	0.725**
		23.3092	94	23.3092	64		9 days after flowering	0.600*	0.683*
		21.8439	98	21.8439	68		12 days after flowering	0.913**	0.875**
		26.666	113	26.666	86		15 days after flowering	0.695*	0.549
		27.209	112	27.209	89
		28.3989	112	28.3989	87
		24.793	110	24.793	84
		24.6729	119	24.6729	89
		25.674	117	25.674	84
	6 day after flowering	26.8439	101	26.8439	68
		27.6571	97	27.6571	66
		27.2505	101	27.2505	68
		25.2018	96	25.2018	66
		27.1059	94	27.1059	64
		26.633	98	26.633	68
		28.2051	113	28.2051	86
		27.8974	112	27.8974	89
		28.0512	112	28.0512	87
		28.1113	110	28.1113	84
		27.6629	119	27.6629	89
		28.5597	117	28.5597	84
	9 day after flowering	20.4293	101	20.4293	68
		20.8227	97	20.8227	66
		18.715	101	18.715	68
		18.2295	96	18.2295	66
		19.5559	94	19.5559	64
		18.9807	98	18.9807	68
		20.1224	113	20.1224	86
		21.1599	112	21.1599	89
		20.5951	112	20.5951	87
		24.449	110	24.449	84
		22.1359	119	22.1359	89
		25.5516	117	25.5516	84
	12 day after flowering	19.2911	101	19.2911	68
		19.3409	97	19.3409	66
		17.1202	101	17.1202	68
		17.3113	96	17.3113	66
		17.2884	94	17.2884	64
		18.6263	98	18.6263	68
		23.2611	113	23.2611	86
		23.668	112	23.668	89
		21.237	112	21.237	87
		21.0631	110	21.0631	84
		21.7551	119	21.7551	89
		22.4948	117	22.4948	84
	15 day after flowering	15.1374	101	15.1374	68
		12.8692	97	12.8692	66
		13.545	101	13.545	68
		15.4776	96	15.4776	66
		16.8181	94	16.8181	64
		15.8272	98	15.8272	68
		17.7833	113	17.7833	86
		18.4981	112	18.4981	89
		18.0906	112	18.0906	87
		16.6279	110	16.6279	84
		15.9942	119	15.9942	89
		16.6578	117	16.6578	84
